# Supplementary material for: A genome-wide CRISPR screen identifies DPM1 as a modifier of DPAGT1 deficiency and ER stress
Source: PubMed Central journal article supplement (PMC9543880; doi:10.1371/journal.pgen.1010430), 2022-09-27

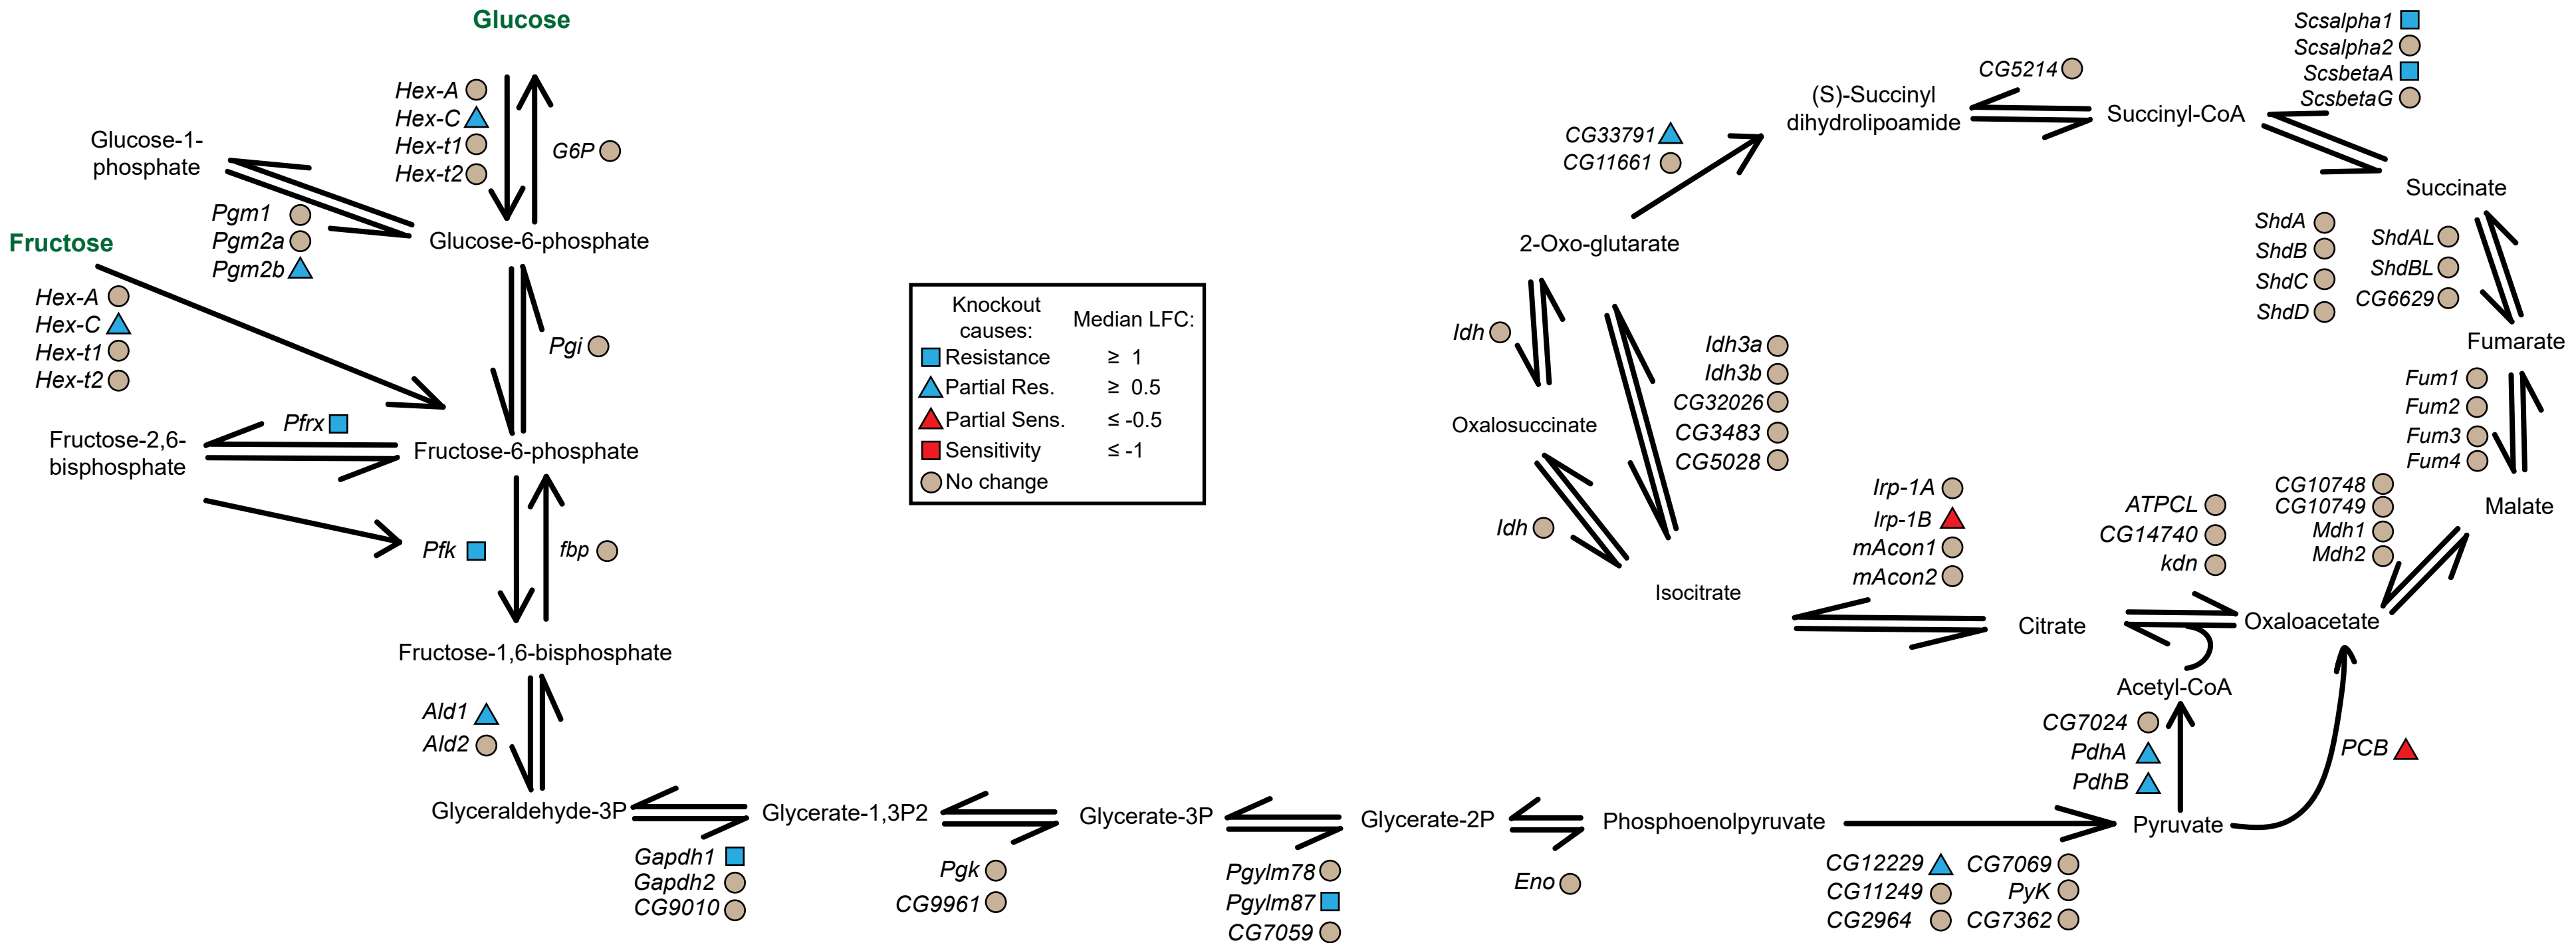

Supplement: pgen.1010430.s005.pdf [file pgen.1010430.s005.pdf]
